# Supplementary material
Source: publisher figshare collection journal article supplement (https://acs.figshare.com/ndownloader/files/4543450)
Supplement: Supplementary file 1 [file 4543450]

**Supplementary data, Table 5 – False Discovery Rate (FDR) for proteins found with two peptides using the MASCOT™ search engine in the SwissProt™ mus musculus database with an error tolerance of 1 ppm**

| proteins used for the MASCOT™ search at 1 ppm, with two or more MS/MS identified peptides. |                   | Total number of peptide masses. | Number of combinations of two peptides. | False protein found within 1 ppm, with 2 peptides, | FDR for 2 peptides in a single Mascot™ search at 1 ppm. |
|--------------------------------------------------------------------------------------------|-------------------|---------------------------------|-----------------------------------------|----------------------------------------------------|---------------------------------------------------------|
| Cbr2                                                                                       | Hba-a1            | 4                               | 6                                       | -                                                  | -                                                       |
| Cbr2                                                                                       | Rps27a            | 4                               | 6                                       | -                                                  | -                                                       |
| Cbr2                                                                                       | Hist1h4a          | 4                               | 6                                       | -                                                  | -                                                       |
| Hist1h4a                                                                                   | Rps27a            | 4                               | 6                                       | -                                                  | -                                                       |
| Hba-a1                                                                                     | Rps27a            | 4                               | 6                                       | -                                                  | -                                                       |
| Hba-a1                                                                                     | Hist1h4a          | 4                               | 6                                       | -                                                  | -                                                       |
| Rps27a                                                                                     | Alb               | 5                               | 10                                      | -                                                  | -                                                       |
| Hba-a1                                                                                     | Alb               | 5                               | 10                                      | -                                                  | -                                                       |
| Cbr2                                                                                       | Alb               | 5                               | 10                                      | -                                                  | -                                                       |
| Hist1h4a                                                                                   | Alb               | 5                               | 10                                      | -                                                  | -                                                       |
| Actb                                                                                       | Cbr2              | 5                               | 10                                      | -                                                  | -                                                       |
| Hist1h4a                                                                                   | Actb              | 5                               | 10                                      | -                                                  | -                                                       |
| Actb                                                                                       | Hba-a1            | 5                               | 10                                      | -                                                  | -                                                       |
| Actb                                                                                       | Rps27a            | 5                               | 10                                      | -                                                  | -                                                       |
| Actb                                                                                       | Alb               | 6                               | 15                                      | -                                                  | -                                                       |
| Actc1                                                                                      | Rps27a            | 6                               | 15                                      | -                                                  | -                                                       |
| Actc1                                                                                      | Hist1h4a          | 6                               | 15                                      | HOOK3_MOUSE                                        | 0.07                                                    |
| Actc1                                                                                      | Cbr2              | 6                               | 15                                      | -                                                  | -                                                       |
| Actc1                                                                                      | Hba-a1            | 6                               | 15                                      | -                                                  | -                                                       |
| Actb                                                                                       | Actc1             | 7                               | 21                                      | -                                                  | -                                                       |
| Alb                                                                                        | Actc1             | 7                               | 21                                      | -                                                  | -                                                       |
| Aldh1a1                                                                                    | Cbr2              | 7                               | 21                                      | -                                                  | -                                                       |
| Aldh1a1                                                                                    | Hba-a1            | 7                               | 21                                      | -                                                  | -                                                       |
| Aldh1a1                                                                                    | Hist1h4a          | 7                               | 21                                      | -                                                  | -                                                       |
| Aldh1a1                                                                                    | Rps27a            | 7                               | 21                                      | -                                                  | -                                                       |
| Hbb-b1 and Hbb-b2                                                                          | Cbr2              | 7                               | 21                                      | -                                                  | -                                                       |
| Hbb-b1 and Hbb-b2                                                                          | Hba-a1            | 7                               | 21                                      | -                                                  | -                                                       |
| Hbb-b1 and Hbb-b2                                                                          | Hist1h4a          | 7                               | 21                                      | -                                                  | -                                                       |
| Hbb-b1 and Hbb-b2                                                                          | Rps27a            | 7                               | 21                                      | -                                                  | -                                                       |
| Aldh2                                                                                      | Cbr2              | 8                               | 28                                      | CAN1_MOUSE                                         | 0.04                                                    |
| Aldh2                                                                                      | Hba-a1            | 8                               | 28                                      | -                                                  | -                                                       |
| Aldh2                                                                                      | Hist1h4a          | 8                               | 28                                      | -                                                  | -                                                       |
| Aldh2                                                                                      | Rps27a            | 8                               | 28                                      | -                                                  | -                                                       |
| Actc1                                                                                      | Aldh1a1           | 9                               | 36                                      | -                                                  | -                                                       |
| Actc1                                                                                      | Hbb-b1 and Hbb-b2 | 9                               | 36                                      | -                                                  | -                                                       |
| Actb                                                                                       | Aldh2             | 9                               | 36                                      | -                                                  | -                                                       |
| Alb                                                                                        | Aldh2             | 9                               | 36                                      | -                                                  | -                                                       |

**FDR = False Discovery Rate.** The maximum false discovery rate was assessed using masses found in MALDI FTICR MS and sequenced by Orbi-trap analysis in lung samples. A Mascot search (1 ppm) was performed on all combinations of peptides attributed to two different proteins identified in Table 1, to determine the probability of finding an additional (false) identification (see supplementary data). In a total of 116 combinations, two additional identifications were found, which indicates an average FDR of 0.02. The highest FDR we observed was 0.07 in a single set of comparisons, and we took this conservative estimated threshold as FDR with two attributed peptides. For proteins with more than two peptides attributed to a single protein at (1 ppm), we postulate a lower FDR. In the case of a single peptide mass, we calculate the FDR from the inverse of the total number of proteins found in a 1 ppm Mascot search. Several proteins were identified with more than two peptides in a 2 ppm search, however, only one peptide deviates less than 1 ppm from the calculated value. In this case we attribute a high FDR, until supporting evidence is provided.
